# Supplementary material for: Retracted Article: MicroRNA-135a alleviates lipid accumulation and inflammation of atherosclerosis through targeting lipoprotein lipase
Source: Royal Society of Chemistry journal article supplement (doi:10.1039/c9ra05176g), 2019-01-01

Supplement Figure 1. The correlations between miR-135a and HDL-C, LDL-C, TC or TG in serum of AS patients. The levels of HDL-C (A), LDL-C (B), TC (C) and TG (D) in serum samples of AS patients and healthy volunteers. The correlations between miR-135a and HDL-C (E), LDL-C (F), TC (G) or TG (H) in serum of AS patients using Spearman test.

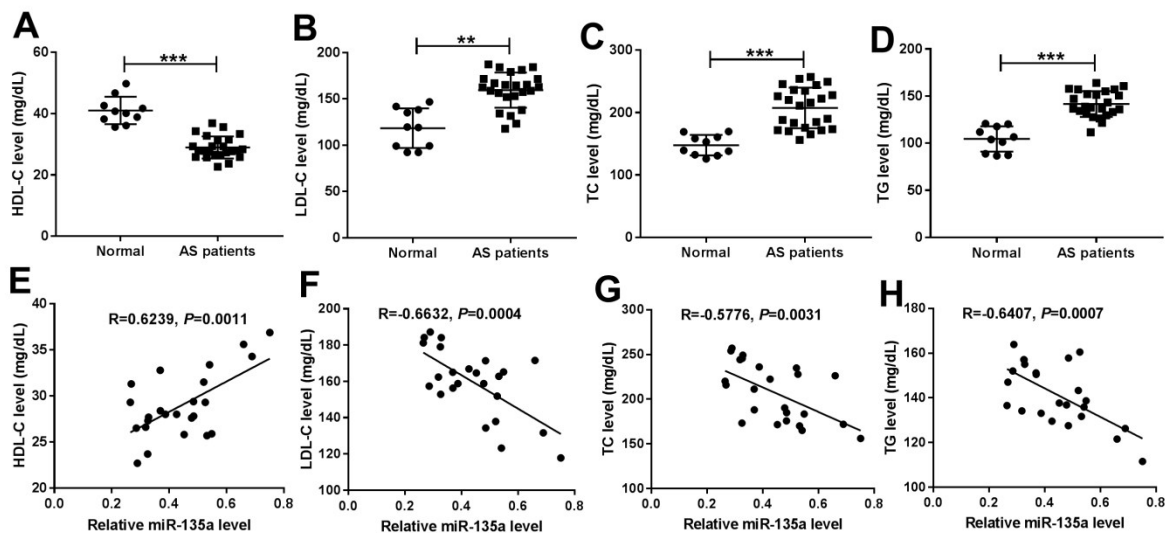

Supplement Figure 2. Representative images and the quantification of atherosclerotic lesion areas in the en face analysis of the whole aorta with Oil red O staining.

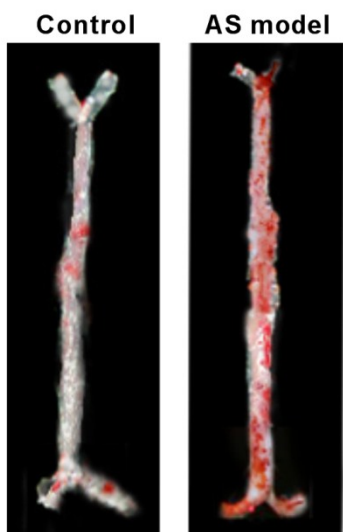

Supplement: c9ra05176g1.pdf [file c9ra05176g1.pdf]
